# Supplementary material
Source: Research Square preprint supplement (doi:10.21203/rs.3.rs-8192471/v1)
Supplement: Supplementary file 1 [file 5b1e789cfebeb3b0bc5e867a.docx]

**Appendix 1: Example tasks of grammar text**

Example tasks include multiple-choice, fill-in-blank, and error-correct questions. Such as:

Multiple-choice

1. What is the correct structure for the present perfect tense in affirmative sentences?

A. Subject + have/has + base verb

B. Subject + have/has + past participle

C. Subject + had + past participle

D. Subject + have/has + verb-ing

2. Which sentence uses the present perfect to talk about life experiences?

A. I went to Paris in 2020.

B. I have been to Paris three times.

C. I am going to Paris next week.

D. I was in Paris last year.

Fill-in-blank

1. How long ______ you ______ (live) in this town?
2. He ______ just ______ (arrive) home from school.

Error-correct

1. I have saw a tiger at the zoo last month.
2. She has lived in Canada since three years.

**Appendix 2: Interview list**

| **Student ID** | **Gender** | **Age** | **Major** | **Interview content (Benefits)** | **Interview content (Challenges)** | **Interview content (Suggestions)** |
| --- | --- | --- | --- | --- | --- | --- |
| 1 | M | 24 | MADLT (LALA) | Immersive environment attracts attention; scene changes enhance focus and understanding of the present perfect tense | Unskilled operation, dizziness | Add voice interaction |
| 2 | F | 28 | MADLT (LALA) | VR is engaging and immersive, the game format boosts enthusiasm and participation | Physical discomfort | Control device wearing time |
| 3 | F | 23 | MADLT (LALA) | VR is appealing and immersive, significantly improves concentration and focus | VR’s novelty causes distraction | Add voice assistance |
| 4 | M | 23 | MADLT (DMML) | VR is vivid, immersive, and sparks deep engagement | Cost constraints limit accessibility | Make the device lighter |
| 5 | F | 23 | MADLT (LALA) | High interactivity enhances immersion; AI feedback stimulates learning enthusiasm and involvement | AI requires adjustment for better personalization | Add more practice sessions after the learning phase |
| 6 | F | 24 | MADLT (ESE) | Gamification and VR immersion deepen understanding, enhance engagement, and boost learning interest | Technical difficulty in initial setup | Strengthen AI guidance |
| 7 | M | 23 | MT (ELE) | Boosts interest, strengthens engagement, immersion, and active participation | Attention dispersion due to immersive environment | Adjust teaching steps, let AI teach first before entering the scene |
| 8 | M | 23 | MSc (AI&EdTech) | Learning in VR is fun, immersive, and fosters engagement, scenes aid understanding | Need to adapt to device operation | Increase interaction with dynamic feedback |
| 9 | F | 25 | MACSLE | VR combined with gamification is innovative, immersive scenarios enhance learner involvement | Desire to explore non-learning-related content | Integrate traditional teaching methods |
| 10 | M | 24 | MADLT (TEF) | VR is like multimedia, boosts immersion and engagement through interactive elements | Dizziness | Enhance guidance through interactive prompts |
| 11 | F | 24 | MAGSE | Immersion strengthens the impression of learning content and sustains learner engagement | Physical strain from extended wearing | Add interactivity to gamified stages |
| 12 | F | 23 | MAGHE | VR attracts attention, improves focus, and encourages prolonged immersion | Physical discomfort | Make knowledge points more densely connected |
| 13 | M | 23 | MADLT (TEF) | Immersive environment enhances attention, boosts engagement, and supports sustained focus | Unskilled technical operation | Add voice interaction, reduce typing input |
| 14 | M | 23 | MEd | Fun like playing a game, VR immersion increases learner participation | Physical discomfort | Control VR device usage duration |
| 15 | F | 26 | MT | VR is very appealing, immersive, and promotes active engagement | Dizziness | Engage other senses for interaction, such as voice input, to reduce dizziness |
| 16 | M | 23 | MSc (AI&EdTech) | VR is vivid, immersive, and fosters a highly engaging learning experience | Long-term device wearing causes pressure | Make the device lighter |
| 17 | F | 23 | MADLT (ESE) | High interactivity and immersion create a collaborative learning environment | Somewhat difficult for learners with insufficient knowledge reserve | Add practice with interactive reviews, and add audio cues for better navigation |
| 18 | M | 22 | BEd(PVE) | VR and AI give immediate help, making hard grammar easier to learn and more fun. | Over-reliance on AI reduces independent and creative thinking. | Encourage independent thinking with open questions and less AI help. |
| 19 | F | 32 | MADLT (LALA) | VR and AI make learning faster and more motivating with personalized help. | It’s hard to use at first. It takes time to learn. | Add a fun tutorial to help beginners start fast. |
| 20 | M | 26 | MSc (AI&EdTech) | AI and VR make learning fun and help me remember. | The headset is too heavy and uncomfortable. | Make future devices lighter and more comfortable. |

**Appendix 3: Learners’ experience analysis**

| **Category** | **Theme** | **Quantity** | **Frequency (%)** | **Interview content** |
| --- | --- | --- | --- | --- |
| **Benefits** | Immersion and engagement | 18 | 90% | Student 1: Immersive environment attracts attention; scene changes enhance focus...  Student 2: VR is engaging and immersive...  Student 3: VR is appealing and immersive, significantly improves concentration...  Student 4: VR is vivid, immersive, and sparks deep engagement  Student 5: High interactivity enhances immersion...  Student 6: Gamification and VR immersion deepen understanding, enhance engagement...  Student 7: Boosts interest, strengthens engagement, immersion...  Student 8: Learning in VR is fun, immersive, and fosters engagement...  Student 9: VR combined with gamification is innovative, immersive scenarios...  Student 10: VR is like multimedia, boosts immersion and engagement...  Student 11: Immersion strengthens the impression...  Student 12: VR attracts attention, improves focus...  Student 13: Immersive environment enhances attention...  Student 14: Fun like playing a game, VR immersion...  Student 15: VR is very appealing, immersive...  Student 16: VR is vivid, immersive...  Student 17: High interactivity and immersion...  Student 20: AI and VR make learning fun... |
| Interactivity and motivation | 12 | 60.00% | Student 2: game format boosts enthusiasm...  Student 5: AI feedback stimulates learning enthusiasm...  Student 6: Gamification... boost learning interest  Student 7: active participation  Student 8: scenes aid understanding  Student 9: gamification... enhance learner involvement  Student 10: interactive elements  Student 11: sustains learner engagement  Student 12: encourages prolonged immersion  Student 14: increases learner participation  Student 17: create a collaborative learning environment  Student 18: AI give immediate help... more fun |
| Concrete understanding | 9 | 45.00% | Student 1: enhance... understanding of the present perfect tense  Student 4: scenes aid understanding  Student 8: scenes aid understanding  Student 6: deepen understanding  Student 11: strengthens the impression of learning content  Student 12: improves focus  Student 18: making hard grammar easier to learn  Student 19: help me remember  Student 20: make learning faster |
| **Challenges** | Physical discomfort and device issues | 10 | 50.00% | Student 1: dizziness  Student 2: Physical discomfort  Student 10: Dizziness  Student 11: Physical strain from extended wearing  Student 12: Physical discomfort  Student 14: Physical discomfort  Student 15: Dizziness  Student 16: Long-term device wearing causes pressure, too heavy  Student 17: pressure  Student 20: The headset is too heavy and uncomfortable |
| Distraction and over-reliance on AI | 4 | 20.00% | Student 3: VR’s novelty causes distraction  Student 7: Attention dispersion due to immersive environment  Student 9: Desire to explore non-learning-related content  Student 18: Over-reliance on AI reduces independent and creative thinking |
| Technical difficulty | 7 | 35.00% | Student 1: Unskilled operation  Student 6: Technical difficulty in initial setup  Student 8: Need to adapt to device operation  Student 13: Unskilled technical operation  Student 17: difficult for learners with insufficient knowledge reserve  Student 19: It’s hard to use at first  Student 4: Cost constraints |
| **Suggestions** | Enhanced interactivity and feedback | 9 | 45.00% | Student 1: Add voice interaction  Student 4: Add voice assistance  Student 5: Add more practice sessions  Student 8: Increase interaction with dynamic feedback  Student 11: Add interactivity to gamified stages  Student 13: Add voice interaction, reduce typing  Student 15: Engage other senses... voice input  Student 17: Add practice with interactive reviews, audio cues  Student 18: Encourage independent thinking with open questions  Student 12: Make knowledge points more densely connected |
| Device optimization and comfort | 7 | 35.00% | Student 2: Control device wearing time  Student 5: Make the device lighter  Student 14: Control VR device usage duration  Student 16: Make the device lighter  Student 20: Make future devices lighter and more comfortable  Student 11: Physical strain  Student 15: reduce dizziness |
| Instructional design and guidance | 6 | 30.00% | Student 6: Strengthen AI guidance  Student 7: Adjust teaching steps, let AI teach first...  Student 9: Integrate traditional teaching methods  Student 10: Enhance guidance through interactive prompts  Student 17: add audio cues for better navigation  Student 19: Add a fun tutorial to help beginners |
